# Supplementary material for: Probiotics in the Treatment of Irritable Bowel Syndrome in General Practice: A Real-World Narrative Review
Source: Preprints.org preprint supplement (doi:10.20944/preprints202403.0312.v1), 2024-03-06
Supplement: Supplementary file 1 [file supplementary]

Table 1. “How do you rate your knowledge of the intestinal Microbiota?

| Adequate | 12 (40,0) |
| --- | --- |
| Scarce | 16 (53,3) |
| None | 2 (6,6) |

Table 2. “If you answered scarce or none to question n. 1, would you be interested in increasing your knowledge about the intestinal Microbiota?”

| Yes | 16 (88,8) |
| --- | --- |
| No | 2 (11.1) |

Table 3. “Are in your opinion probiotics useful in IBS treatment?”

| Yes | 28 (93.3) |
| --- | --- |
| No | 2 (6.6) |
| Don’t know | 0 |

Table 4. “How often do you prescribe probiotics in your IBS patients (%)?”

| Never | 0 |
| --- | --- |
| 1-25 | 6 (20) |
| 26-50 | 8 (26,6) |
| 51-75 | 12 (40) |
| 76-100 | 4 (13,3) |

Table 5. “In which IBS variant do you prescribe probiotics?”

| Diarrhea | 4 (13.3) |
| --- | --- |
| Constipation | 0 |
| Alternate | 0 |
| All | 26 (86.6) |
